# Supplementary material for: Fluorescence Correlation Spectroscopy Analysis of Effect of Molecular Crowding on Self-Assembly of β-Annulus Peptide into Artificial Viral Capsid
Source: Int J Mol Sci. 2021 Apr 30;22(9):4754. doi: 10.3390/ijms22094754 (PMC8125178; doi:10.3390/ijms22094754)
Supplement: Supplementary file 1 [file ijms-22-04754-s001.zip › ijms-1171155-supplementary.pdf]

## Supplementary Materials

### Fluorescence Correlation Spectroscopy Analysis of Effect of Molecular Crowding on Self-Assembly of $\beta$ -Annulus Peptide into Artificial Viral Capsid

Risako Kobayashi,<sup>a</sup> Hiroshi Inaba,<sup>ab</sup> and Kazunori Matsuura \*<sup>ab</sup>

<sup>a</sup> Department of Chemistry and Biotechnology, Graduate School of Engineering, Tottori University, Koyama-Minami 4-101, Tottori 680-8552, Japan

<sup>b</sup> Centre for Research on Green Sustainable Chemistry, Tottori University, Koyama-Minami 4-101, Tottori 680-8552, Japan

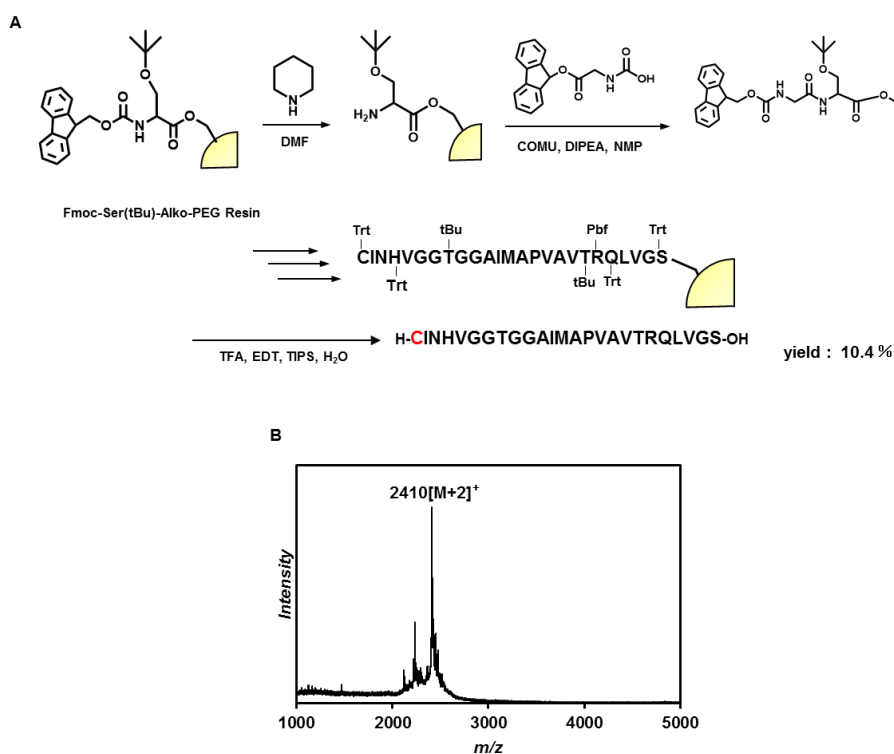

**Figure S1.** Synthesis of Cys- $\beta$ -annulus peptide by solid-phase Fmoc-chemistry (A) and MALDI-TOF-MS (B).

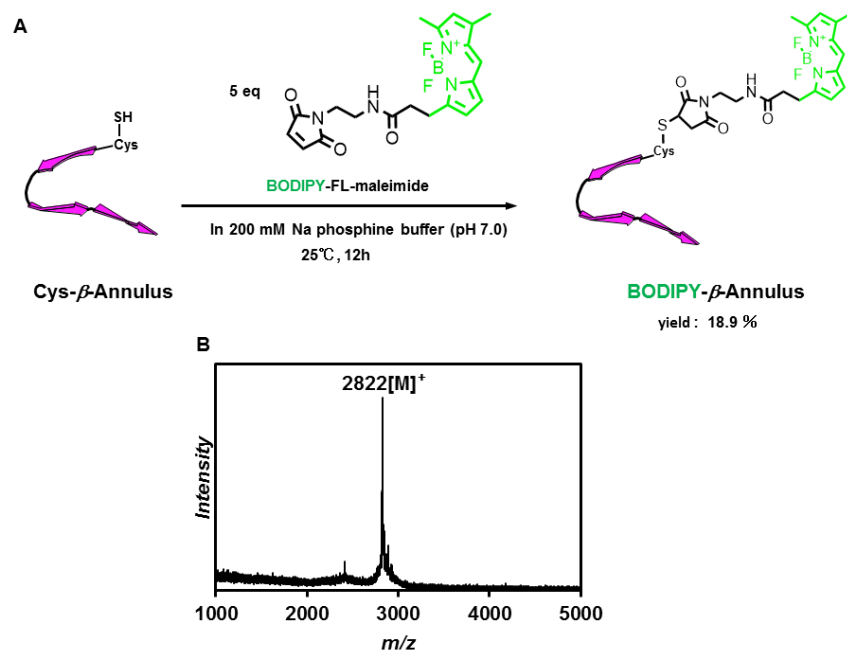

**Figure S2.** Synthesis of BODIPY- $\beta$ -annulus peptide (A) and MALDI-TOF-MS (B).

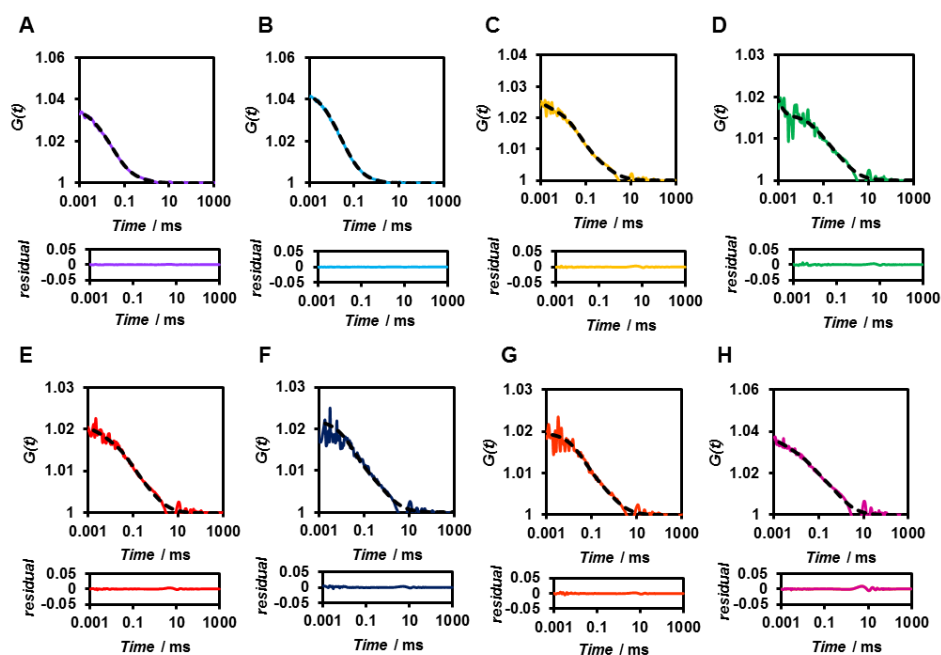

**Figure S3.** Measured (solid) and fitted (dot) autocorrelation curves for 0.1  $\mu\text{M}$  BODIPY- $\beta$ -annulus (A) and mixture of 0.1  $\mu\text{M}$  BODIPY- $\beta$ -annulus and 10 (B), 25 (C), 50 (D), 75 (E), 100 (F), 150 (G), 200  $\mu\text{M}$  (H)  $\beta$ -annulus peptide measured by fluorescence correlation spectroscopy in 10mM Tris-HCl buffer (pH 7.0). The lower graph shows residual plot.

**Table S1.** Viscosity of solution in the presence of PEG.

| Solvent                       | Diffusion time of Alexa 488 / ms | Viscosity / mPa*s |
|-------------------------------|----------------------------------|-------------------|
| 10 mM Tris-HCl buffer(pH 7.0) | 0.0335                           | 0.893             |
| 5 wt% PEG <sub>2000</sub>     | 0.0514                           | 1.34              |
| 10 wt% PEG <sub>2000</sub>    | 0.0726                           | 1.89              |
| 15 wt% PEG <sub>2000</sub>    | 0.143                            | 3.73              |
| 20 wt% PEG <sub>2000</sub>    | 0.163                            | 4.25              |

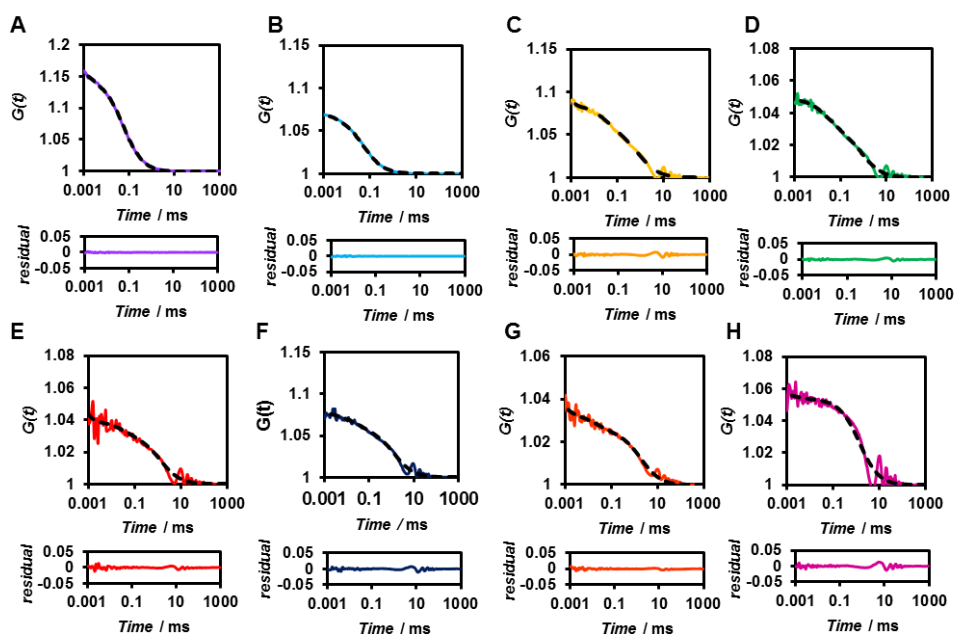

**Figure S4.** Measured (solid) and fitted (dot) autocorrelation curves for 0.1  $\mu$ M BODIPY- $\beta$ -annulus (A) and mixture of 0.1  $\mu$ M BODIPY- $\beta$ -annulus and 10 (B), 25 (C), 50 (D), 75 (E), 100 (F), 150 (G), 200  $\mu$ M (H)  $\beta$ -annulus peptide in 5 wt% PEG<sub>2000</sub> solution measured by fluorescence correlation spectroscopy. The lower graph shows residual plot.

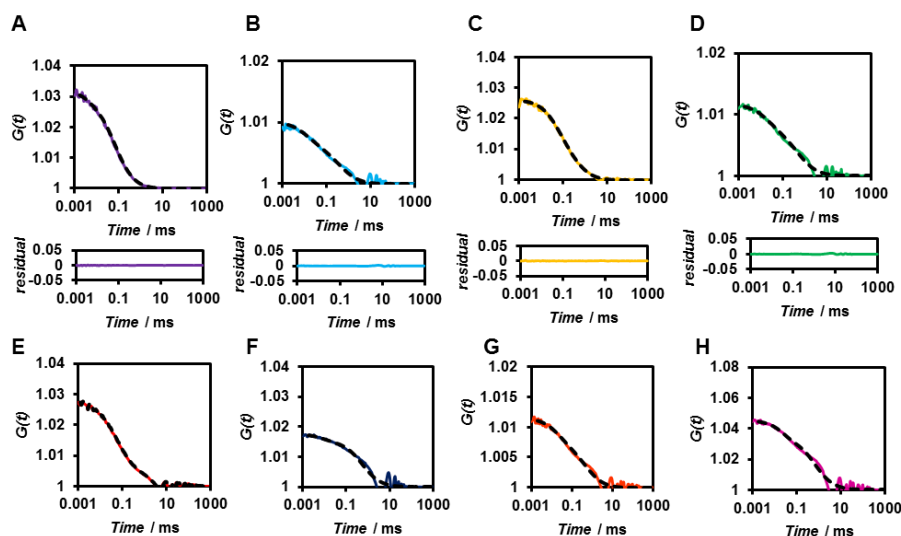

**Figure S5.** Measured (solid) and fitted (dot) autocorrelation curves for 0.1  $\mu\text{M}$  BODIPY- $\beta$ -annulus (A) and mixture of 0.1  $\mu\text{M}$  BODIPY- $\beta$ -annulus and 10 (B), 25 (C), 50 (D), 75 (E), 100 (F), 150 (G), 200  $\mu\text{M}$  (H)  $\beta$ -annulus peptide in 10 wt% PEG<sub>2000</sub> solution measured by fluorescence correlation spectroscopy. The lower graph shows residual plot.

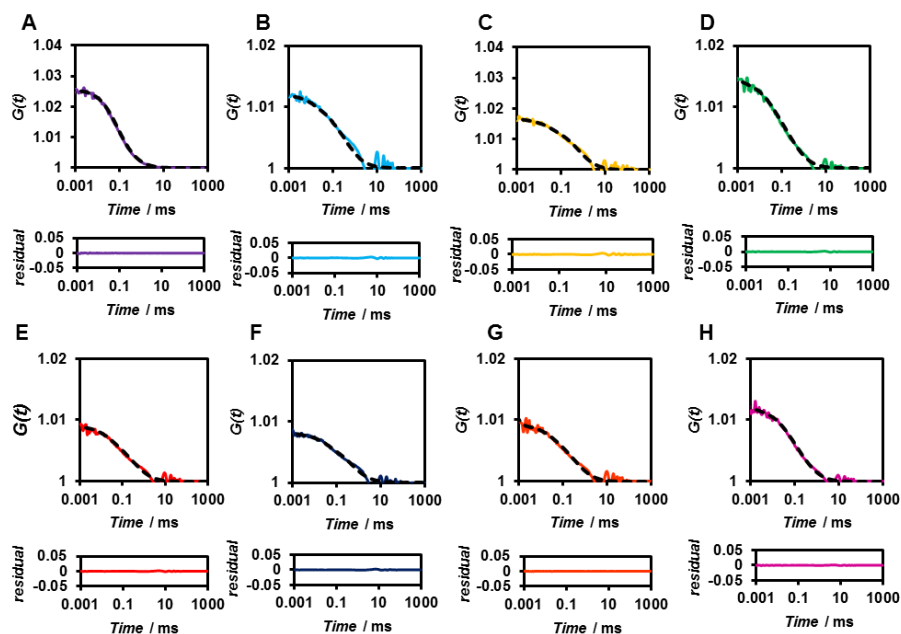

**Figure S6.** Measured (solid) and fitted (dot) autocorrelation curves for 0.1  $\mu\text{M}$  BODIPY- $\beta$ -annulus (A) and mixture of 0.1  $\mu\text{M}$  BODIPY- $\beta$ -annulus and 10 (B), 25 (C), 50 (D), 75 (E), 100 (F), 150 (G), 200  $\mu\text{M}$  (H)  $\beta$ -annulus peptide in 15 wt% PEG<sub>2000</sub> solution measured by fluorescence correlation spectroscopy. The lower graph shows residual plot.

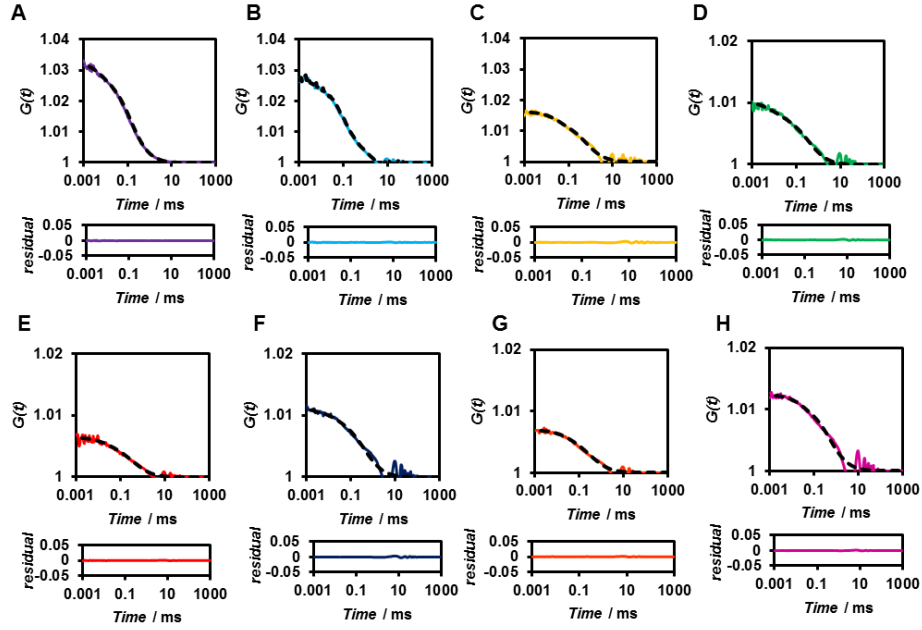

**Figure S7.** Measured (solid) and fitted (dot) autocorrelation curves for 0.1  $\mu\text{M}$  BODIPY- $\beta$ -annulus (A) and mixture of 0.1  $\mu\text{M}$  BODIPY- $\beta$ -annulus and 10 (B), 25 (C), 50 (D), 75 (E), 100 (F), 150 (G), 200  $\mu\text{M}$  (H)  $\beta$ -annulus peptide in 20 wt% PEG<sub>2000</sub> measured by fluorescence correlation spectroscopy. The lower graph shows residual plot.

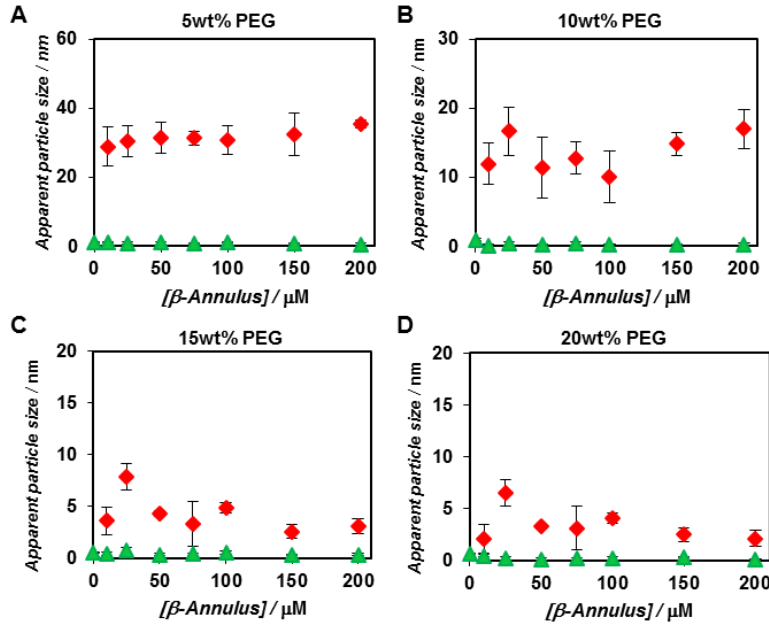

**Figure S8.**  $\beta$ -annulus peptides concentration dependence of the apparent diameter (A ~ D) and of the fast component (green) and the slow component (red) determined by FCS curve fitting ( $N = 3$ ) at constant 0.1  $\mu\text{M}$  BODIPY- $\beta$ -annulus peptide under 5 wt% (A), 10wt% (B), 15wt% (C), 20wt% (D) PEG<sub>2000</sub> at 25  $^{\circ}\text{C}$ .

**Table S2.** Effect of PEG on BODIPY- $\beta$ -annulus peptide.

|                                | Diffusion time of 0.1 $\mu$ M<br>BODIPY- $\beta$ -annulus peptide<br>/ ms | Apparent diameter<br>/ nm |
|--------------------------------|---------------------------------------------------------------------------|---------------------------|
| 10 mM Tris-HCl buffer (pH 7.0) | 0.0301                                                                    | 1.00                      |
| 5 wt% PEG <sub>2000</sub>      | 0.0431                                                                    | 1.12                      |
| 10 wt% PEG <sub>2000</sub>     | 0.0631                                                                    | 0.937                     |
| 15 wt% PEG <sub>2000</sub>     | 0.0776                                                                    | 0.541                     |
| 20 wt% PEG <sub>2000</sub>     | 0.107                                                                     | 0.643                     |
